# Supplementary material for: High-performance solution-processed red hyperfluorescent OLEDs based on cibalackrot
Source: Royal Society of Chemistry journal article supplement (doi:10.1039/d1tc04937b), 2021-12-13
Supplement: d1tc04937b1.pdf [file d1tc04937b1.pdf]

**Supplementary Information:**

**High-Performance Solution-Processed Red Hyperfluorescent OLEDs Based on Cibalackrot**

Nicholle R. Wallwork,<sup>a,b</sup> Masashi Mamada,<sup>c,\*</sup> Atul Shukla,<sup>a,d</sup> Sarah K. M. McGregor,<sup>a,b</sup>  
Chihaya Adachi,<sup>c,d,\*</sup> Ebinazar B. Namdas<sup>a,e,\*</sup> and Shih-Chun Lo<sup>a,b,\*</sup>

<sup>a</sup> *Centre for Organic Photonics & Electronics, The University of Queensland, Brisbane, Queensland, 4072, Australia*

<sup>b</sup> *School of Chemistry and Molecular Biosciences, The University of Queensland, Brisbane, Queensland, 4072, Queensland, Australia*

<sup>c</sup> *Centre for Organic Photonics and Electronics Research (OPERA), Kyushu University, 744 Motoooka, Nishi, Fukuoka 819-0395, Japan*

<sup>d</sup> *International Institute for Carbon Neutral Energy Research (WPI-I2CNER), Kyushu University, 744 Motoooka, Nishi, Fukuoka 819-0395, Japan*

<sup>e</sup> *School of Mathematics and Physics, The University of Queensland, Queensland, Brisbane, Queensland, 4072, Australia*

**Table of Contents**

|                                                                                                                                                                |   |
|----------------------------------------------------------------------------------------------------------------------------------------------------------------|---|
| Table S1 Photophysical properties in solution.....                                                                                                             | 2 |
| Table S2 Photophysical properties in neat films.....                                                                                                           | 2 |
| Table S3 Photophysical properties of Cibalackrot B blend films .....                                                                                           | 6 |
| Figure S1 UV-Vis absorption, fluorescence, and phosphorescence of compounds in solution and neat film.....                                                     | 3 |
| Figure S2 Normalised absorption, and PL spectra of thin films containing varying mol% of Cibalackrot with TADF material 4CzIPN or 4CzIPN- <sup>t</sup> Bu..... | 4 |
| Figure S3 Solid state TCSPC prompt and delayed fluorescence decay of thin films .....                                                                          | 5 |
| Figure S4 EQEs (%) (>100 cd m <sup>-2</sup> ) of hyperfluorescent OLEDs <i>versus</i> electroluminescent peak wavelength ( $\lambda_{EL}$ ) (nm). .....        | 6 |
| References. ....                                                                                                                                               | 7 |

**Table S1** Photophysical properties in solution

| Compound <sup>a</sup>   | $\lambda_{\text{abs}}$<br>(nm) <sup>b</sup> | $E_{\text{g}}^{\text{opt}}$<br>(eV) <sup>c</sup> | $\lambda_{\text{fluo}}$<br>(nm) <sup>b</sup> | $S_1$<br>(eV) <sup>c</sup> | $\lambda_{\text{phos}}$<br>(nm) <sup>d</sup> | $T_1$<br>(eV) <sup>c</sup> | $\Delta E_{\text{ST}}$<br>(eV) |
|-------------------------|---------------------------------------------|--------------------------------------------------|----------------------------------------------|----------------------------|----------------------------------------------|----------------------------|--------------------------------|
| CBP                     | 294, 327, 340                               | 3.52                                             | 366                                          | 3.56                       | 487, 512                                     | 2.77                       | 0.79                           |
| 4CzIPN- <sup>t</sup> Bu | 280, 387, 467                               | 2.53                                             | 525                                          | 2.61 (2.61) <sup>e</sup>   | 502                                          | 2.61                       | <0.01                          |
| 4CzIPN                  | 281, 374, 449                               | 2.65                                             | 512                                          | 2.70 (2.69) <sup>e</sup>   | 496                                          | 2.65                       | 0.05                           |
| Cibalackrot             | 281, 527, 567                               | 2.09                                             | 594                                          | 2.18                       | – <sup>f</sup>                               | – <sup>f</sup>             | – <sup>f</sup>                 |

<sup>a</sup> In toluene. <sup>b</sup> Measured in ambient conditions. <sup>c</sup> Calculated from  $\lambda_{\text{onset}}$ . <sup>d</sup> Measured at 77 K with a delay. <sup>e</sup> Values in parenthesis indicate  $S_1$  at 77 K. <sup>f</sup> Could not be detected.

**Table S2** Photophysical properties in neat films

| Compound <sup>a</sup>   | $\lambda_{\text{abs}}$<br>(nm) <sup>b</sup> | $E_{\text{g}}^{\text{opt}}$<br>(eV) <sup>c</sup> | $\lambda_{\text{fluo}}$<br>(nm) <sup>b</sup> | $S_1$<br>(eV) <sup>c</sup> | $\lambda_{\text{phos}}$<br>(nm) <sup>d</sup> | $T_1$<br>(eV) <sup>c</sup> | $\Delta E_{\text{ST}}$<br>(eV) |
|-------------------------|---------------------------------------------|--------------------------------------------------|----------------------------------------------|----------------------------|----------------------------------------------|----------------------------|--------------------------------|
| CBP                     | 296, 330, 343                               | 3.43                                             | 379, 403                                     | 3.46                       | 489, 528                                     | 2.60                       | 0.86                           |
| 4CzIPN- <sup>t</sup> Bu | 292, 387, 457                               | 2.41                                             | 550                                          | 2.52 (2.48) <sup>e</sup>   | 539                                          | 2.46                       | 0.06                           |
| 4CzIPN                  | 289, 381, 452                               | 2.46                                             | 568                                          | 2.47 (2.43) <sup>e</sup>   | 553                                          | 2.41                       | 0.06                           |

<sup>a</sup> Spin-coated onto a quartz substrate from chloroform. <sup>b</sup> Measured in ambient conditions. <sup>c</sup> Calculated from  $\lambda_{\text{onset}}$ . <sup>d</sup> Measured at 77 K with a delay. <sup>e</sup> Values in parenthesis indicate  $S_1$  at 77 K.

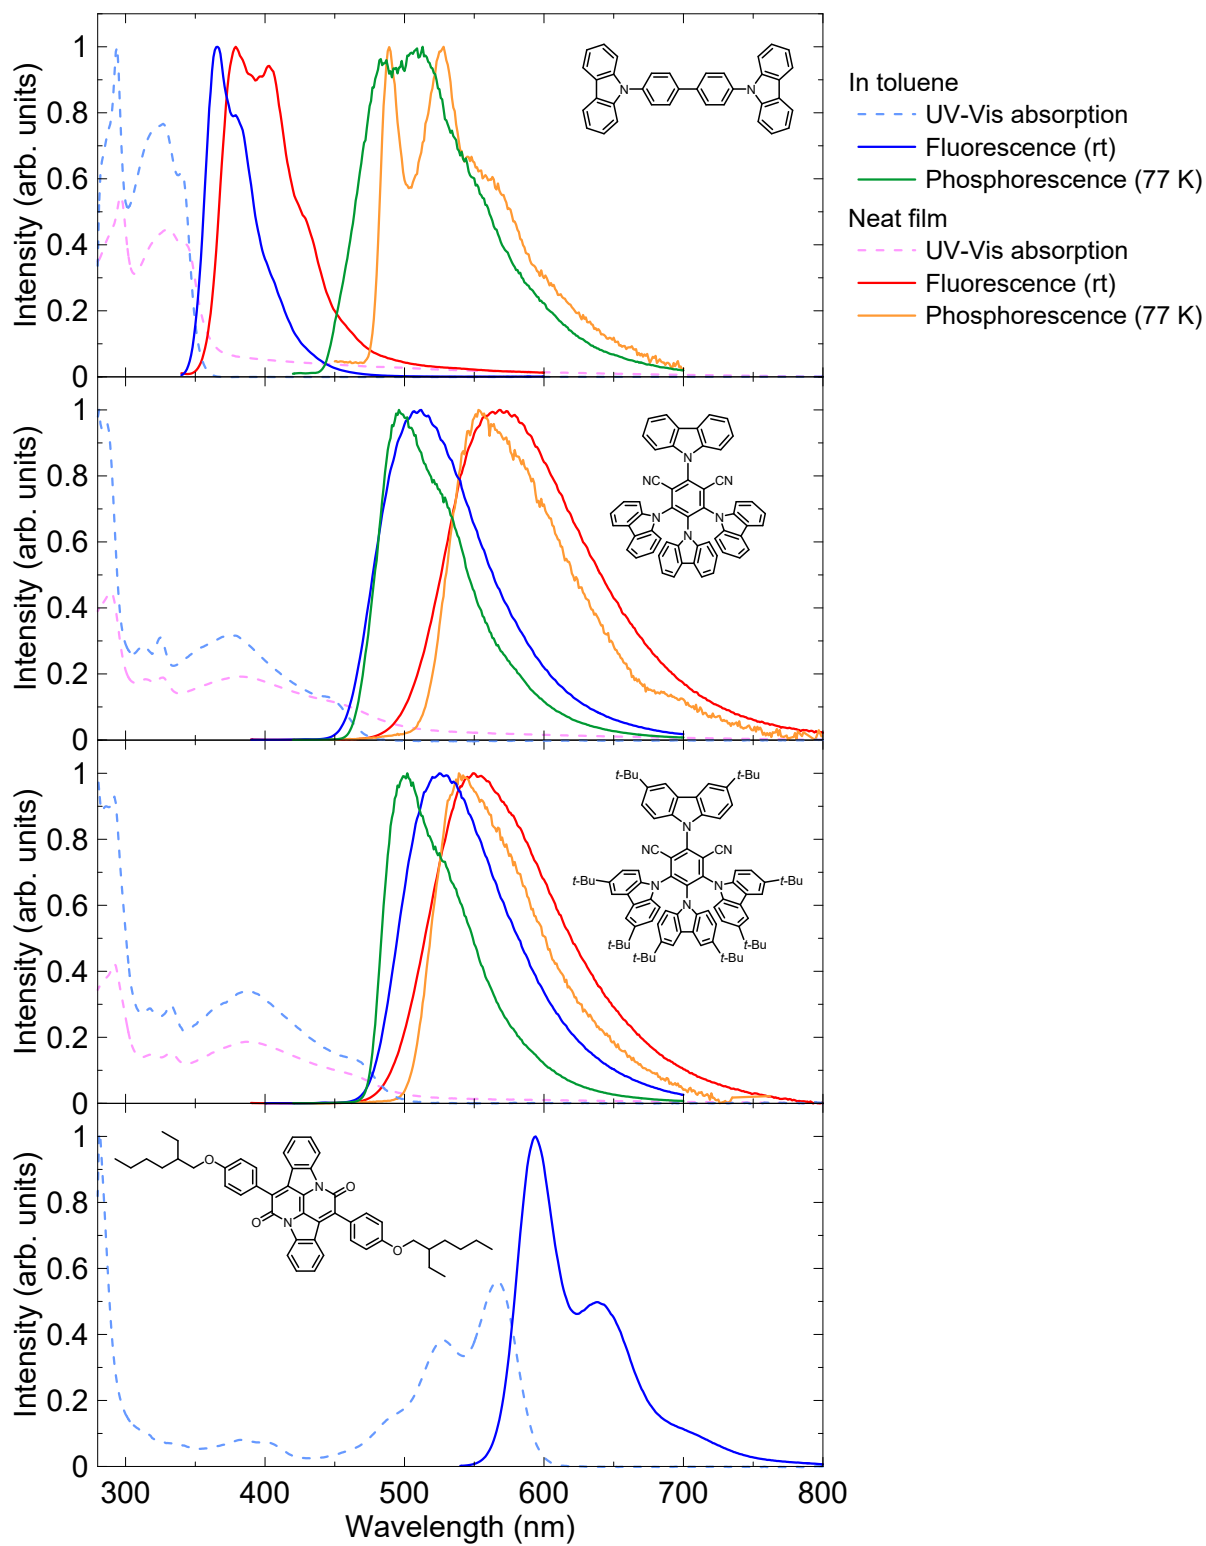

**Figure S1** UV-Vis absorption, fluorescence, and phosphorescence of compounds (inset) in solution and neat films.

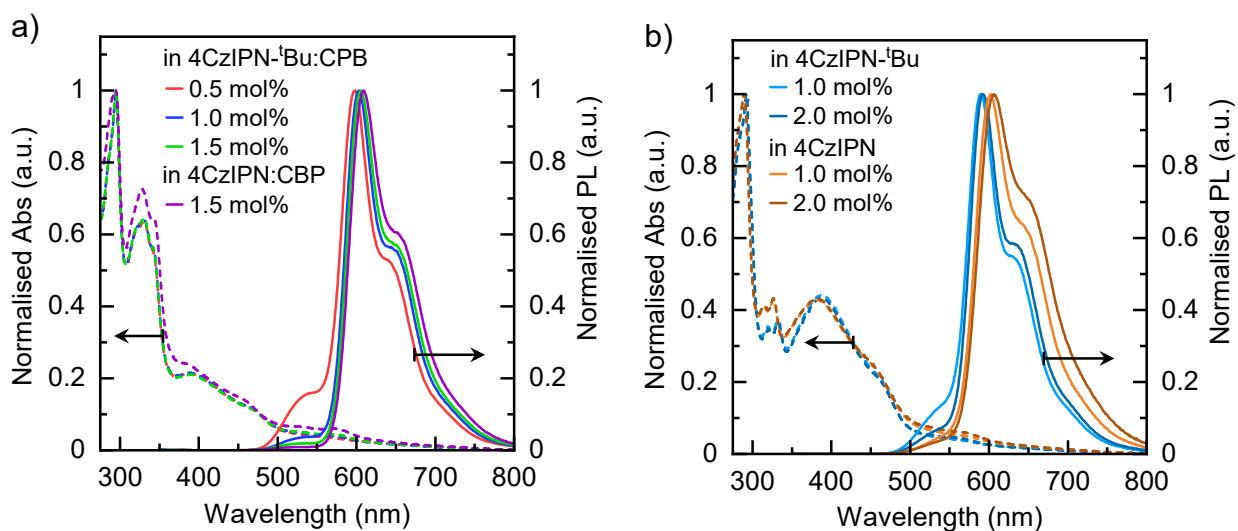

**Figure S2** Normalised absorption (dashed lines), and PL (solid lines) spectra of thin films containing varying mol% of Cibalackrot with TADF material 4CzIPN or 4CzIPN-<sup>t</sup>Bu. a) ternary blends containing TADF:CBP  $\approx$ 30:70 mol%, or b) a binary blend with TADF material. All films were spin-coated from 0.5 wt% chloroform solution.

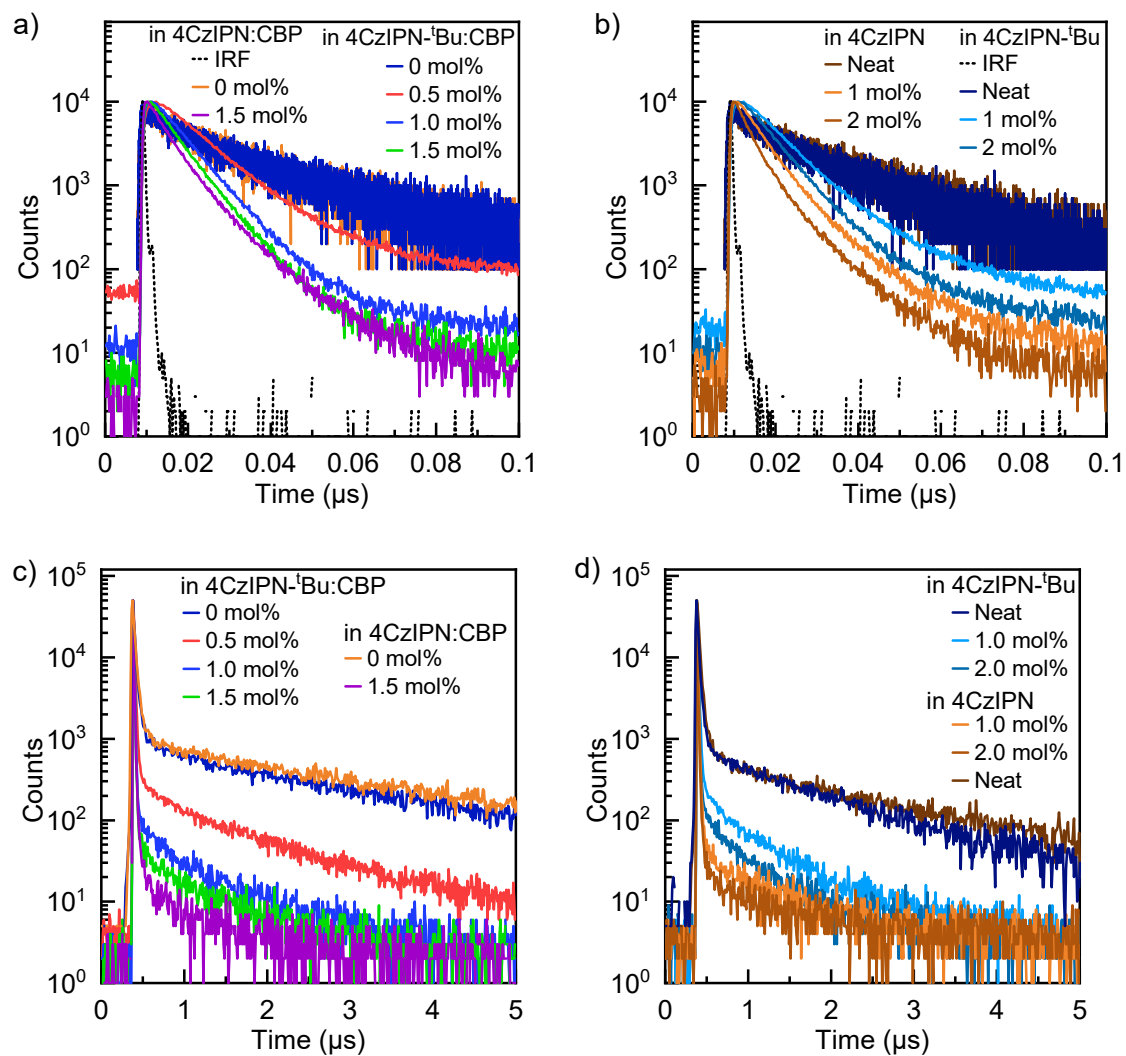

**Figure S3** Solid state TCSPC prompt and delayed fluorescence decay of thin films containing varying mol% of Cibalackrot with a TADF material of 4CzIPN or 4CzIPN-<sup>t</sup>Bu. a) Prompt fluorescence decay of ternary blends containing TADF:CBP  $\approx$ 30:70 mol%, compared with binary blends of TADF:host, b) prompt fluorescence decay of binary blend with TADF material, c) delayed fluorescence decay of ternary blends, and d) delayed fluorescence decay of binary blends. All films were spin-coated from 0.5 wt% chloroform solution.

| Blend Ratio (mol%) |      |                         | Host | $\lambda_{Abs}$<br>(nm)         | $\lambda_{PL}$<br>(nm) | PLQY<br>(%) | $\tau_p$<br>(ns) | $\tau_d$<br>(ns) |
|--------------------|------|-------------------------|------|---------------------------------|------------------------|-------------|------------------|------------------|
| Cibalackrot        | TADF |                         |      |                                 |                        |             |                  |                  |
| 0.5                | 29.5 | 4CzIPN- <sup>t</sup> Bu | CBP  | 295, 330 (343 sh), 390 (462 sh) | 540, 598 (639 sh)      | 79          | 18.5             | 836              |
| 1.0                | 29.0 | 4CzIPN- <sup>t</sup> Bu | CBP  | 295, 330 (343 sh), 390 (462 sh) | 603 (642 sh)           | 77          | 9.7              | 564              |
| 1.5                | 28.5 | 4CzIPN- <sup>t</sup> Bu | CBP  | 295, 330 (343 sh), 390 (462 sh) | 606 (647 sh)           | 74          | 7.2              | 603              |
| 1.5                | 28.5 | 4CzIPN                  | CBP  | 295, 327 (344 sh), 378 (454 sh) | 609 (649 sh)           | 69          | 6.68             | 509              |
| 1.0                | 99.0 | 4CzIPN- <sup>t</sup> Bu | –    | 292, 320, 332, 386 (452 sh)     | 590 (631 sh)           | 70          | 12.8             | 562              |
| 2.0                | 98.0 | 4CzIPN- <sup>t</sup> Bu | –    | 292, 320, 332, 386 (452 sh)     | 592 (632 sh)           | 65          | 9.32             | 469              |
| 1.0                | 99.0 | 4CzIPN                  | –    | 289, 316, 327, 382, (450 sh)    | 604 (640 sh)           | 58          | 7.44             | 618              |
| 2.0                | 98.0 | 4CzIPN                  | –    | 289, 316, 327, 382, (450 sh)    | 606 (649 sh)           | 47          | 5.72             | 498              |

**Table S3** Photophysical properties of Cibalackrot B blend films

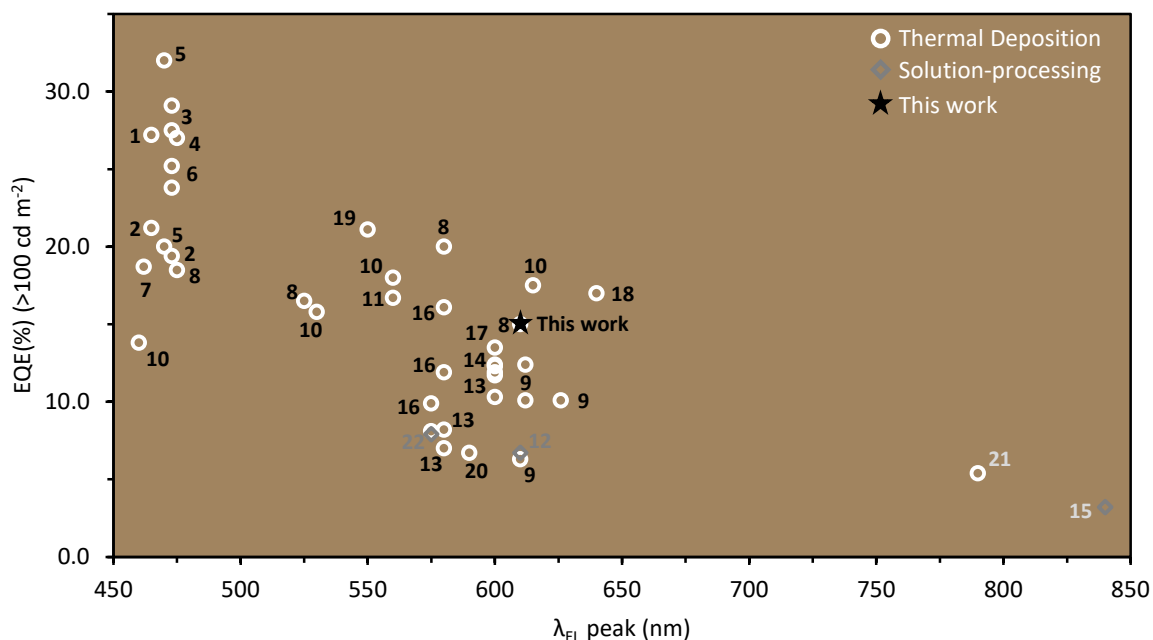

**Figure S4** EQEs (%) ( $>100 \text{ cd m}^{-2}$ ) of hyperfluorescent OLEDs *versus* electroluminescent peak wavelength ( $\lambda_{EL}$ ) (nm). White circles represent devices fabricated by using thermal deposition, grey diamonds represent devices fabricated by using solution processing, and the black star represents this work. Reference according to number label.<sup>1-22</sup>

## References

1. S. H. Han, J. H. Jeong, J. W. Yoo and J. Y. Lee, *J. Mater. Chem. C*, 2019, **7**, 3082-3089.
2. Y. T. Lee, C. Y. Chan, M. Tanaka, M. Mamada, U. Balijapalli, Y. Tsuchiya, H. Nakanotani, T. Hatakeyama and C. Adachi, *Adv. Electron. Mater.*, 2021, **7**, 2001090.
3. R. Braveenth, H. Lee, J. D. Park, K. J. Yang, S. J. Hwang, K. R. Naveen, R. Lampande and J. H. Kwon, *Adv. Funct. Mater.*, 2021, 202105805.
4. K. Stavrou, A. Danos, T. Hama, T. Hatakeyama and A. Monkman, *ACS Appl. Mater. Interfaces*, 2021, **13**, 8643–8655.
5. C.-Y. Chan, M. Tanaka, Y.-T. Lee, Y.-W. Wong, H. Nakanotani, T. Hatakeyama and C. Adachi, *Nat. Photonics*, 2021, **15**, 203–207.
6. S. O. Jeon, K. H. Lee, J. S. Kim, S.-G. Ihn, Y. S. Chung, J. W. Kim, H. Lee, S. Kim, H. Choi and J. Y. Lee, *Nat. Photonics*, 2021, **15**, 208–215.
7. Y. Wada, H. Nakagawa, S. Matsumoto, Y. Wakisaka and H. Kaji, *Nat. Photonics*, 2020, **14**, 643–649.
8. L.-S. Cui, A. J. Gillett, S.-F. Zhang, H. Ye, Y. Liu, X.-K. Chen, Z.-S. Lin, E. W. Evans, W. K. Myers, T. K. Ronson, H. Nakanotani, S. Reineke, J.-L. Bredas, C. Adachi and R. H. Friend, *Nat. Photonics*, 2020, **14**, 636–642.
9. Y.-K. Wang, C.-C. Huang, S. Kumar, S.-F. Wu, Y. Yuan, A. Khan, Z.-Q. Jiang, M.-K. Fung and L.-S. Liao, *Mater. Chem. Front.*, 2019, **3**, 161–167.
10. H. Nakanotani, T. Higuchi, T. Furukawa, K. Masui, K. Morimoto, M. Numata, H. Tanaka, Y. Sagara, T. Yasuda and C. Adachi, *Nat. Commun.*, 2014, **5**, 4016–4016.
11. T. Furukawa, H. Nakanotani, M. Inoue and C. Adachi, *Sci. Rep.*, 2015, **5**, 8429-8429.
12. D. Chen, X. Cai, X.-L. Li, Z. He, C. Cai, D. Chen and S.-J. Su, *J. Mater. Chem. C*, 2017, **5**, 5223–5231.
13. J. H. Kim, K. H. Lee and J. Y. Lee, *Chem. Eur. J.*, 2019, **25**, 9060–9070.
14. D. Li, Y. Hu and L.-S. Liao, *J. Mater. Chem. C.*, 2019, **7**, 977–985.
15. A. Shahalizad, A. Malinge, L. Hu, G. Laflamme, L. Haeblerlé, D. M. Myers, J. Mao, W. G. Skene and S. Kéna-Cohen, *Adv. Funct. Mater.*, 2021, **31**, 2007119.
16. H. H. Cho, A. S. Romanov, M. Bochmann, N. C. Greenham and D. Credgington, *Adv. Opt. Mater.*, 2021, **9**, 2001965.
17. H. S. Kim, S. H. Lee, J. Y. Lee, S. Yoo and M. C. Suh, *J. Phys. Chem. C*, 2019, **123**, 18283–18293.
18. M. Tanaka, R. Nagata, H. Nakanotani and C. Adachi, *ACS Appl. Mater. Interfaces*, 2020, **12**, 50668–50674.
19. B. Yurash, H. Nakanotani, Y. Olivier, D. Beljonne, C. Adachi and T. Q. Nguyen, *Adv. Mater.*, 2019, **31**, 1804490.
20. Y. J. Cho, K. S. Yook and J. Y. Lee, *Adv. Mater.*, 2014, **26**, 6642–6646.
21. J. Brodeur, L. Hu, A. Malinge, E. Eizner, W. G. Skene and S. Kéna-Cohen, *Adv. Opt. Mater.*, 2019, **7**, 1901144.
22. A. Shukla, S. K. M. McGregor, R. Wawrzinek, S. Saggari, E. G. Moore, S.-C. Lo and E. B. Namdas, *Adv. Funct. Mater.*, 2021, **31**, 2009817.
